# Supplementary material
Source: PubMed Central journal article supplement (PMC5125555)
Supplement: NIHMS822116-supplement-1.pdf [file NIHMS822116-supplement-1.pdf]

Figure S1. Dokhani and de Lange

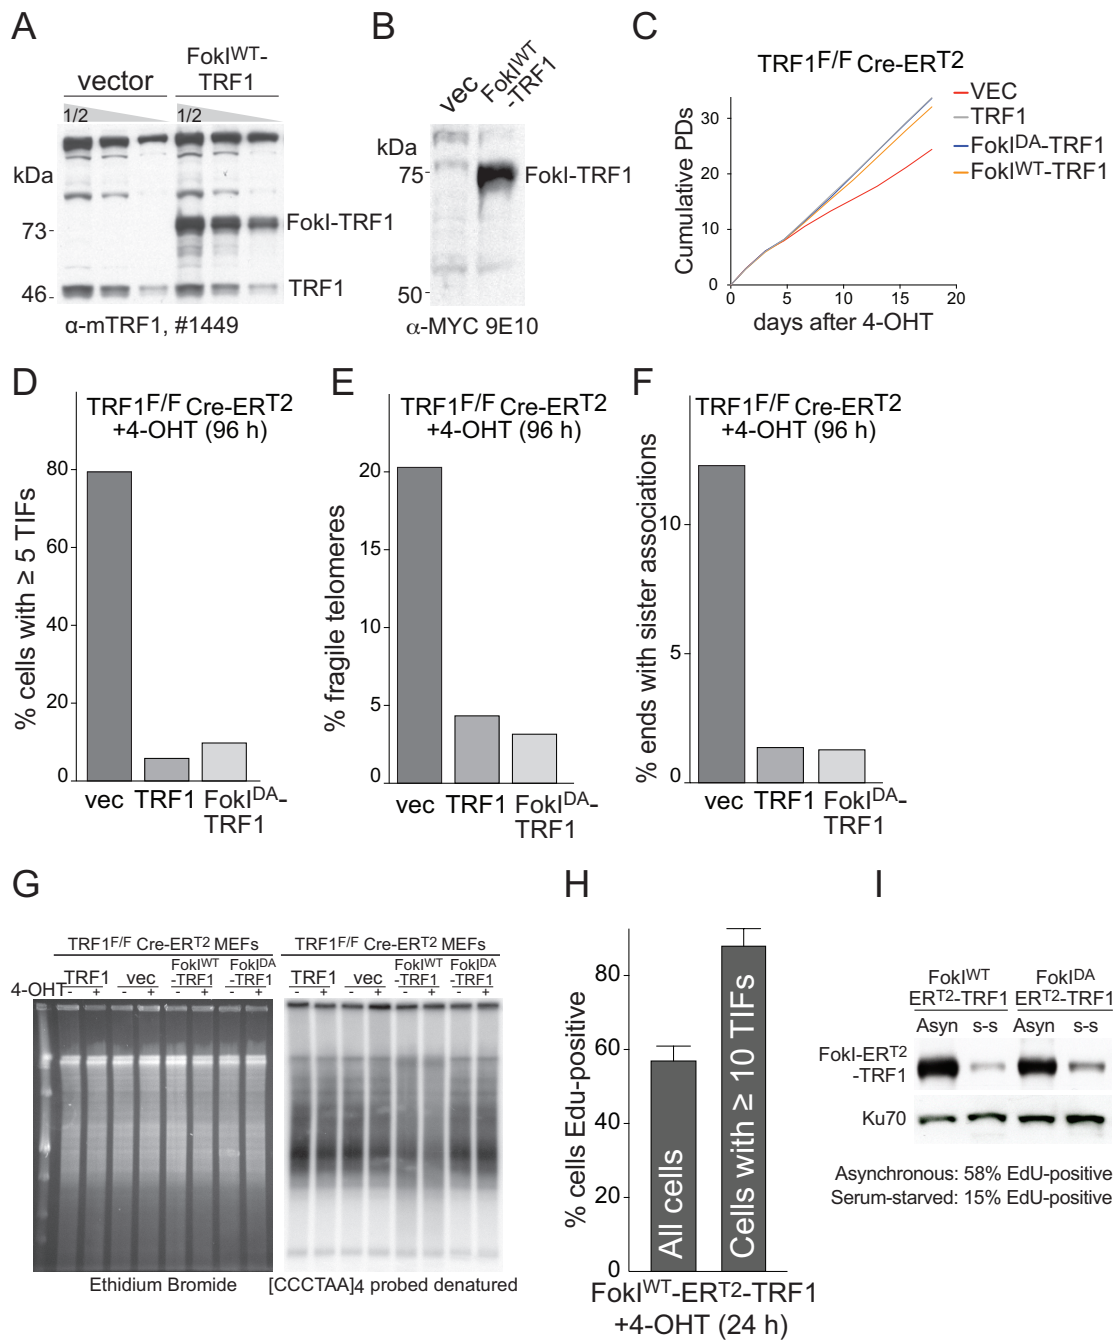

**Figure S1. FokI-TRF1 expression: the effect on cell growth, complementation of endogenous TRF1 deletion and S-phase induction of TIFs , related to Figure 1**

**(A)** Western blot control of FokI<sup>WT</sup>-TRF1 overexpression. SV40LT-immortalized MEFs were infected with either FokI<sup>WT</sup>-TRF1 or the empty vector. Two-fold serial dilutions were loaded to determine the level of FokI<sup>WT</sup>-TRF1 compared to the endogenous TRF1.

**(B)** Western blot of the samples described in (A) analyzed with MYC antibody to detect FokI<sup>WT</sup>-TRF1.

**(C)** Growth rate of cells expressing the indicated proteins. Experimental procedure as in Fig. 1B.

**(D-F)** FokI<sup>DA</sup>-TRF1 complements the loss of the endogenous TRF1. The indicated constructs were introduced by retroviral infection in SV40LT-immortalized TRF1<sup>F/F</sup> RsCre-ER<sup>T2</sup> MEFs and after selection, 4-OHT was added to induce Cre-mediated deletion of the endogenous TRF1 gene. Samples were taken 96 h after 4-OHT and analyzed for TIF-positive cells (D), fragile telomeres (E), and sister telomere associations (F).

**(G)** Ethidium Bromide staining showing equal loading and total telomeric signal for the PFGE gel shown in Fig. 1D.

**(H)** The TIF response occurs primarily in S-phase cells. The conditional FokI<sup>WT</sup>-ER<sup>T2</sup>-TRF1 construct was introduced by retroviral infection in SV40LT-immortalized MEFs. 4-OHT was added to induce FokI<sup>WT</sup>-ER<sup>T2</sup>-TRF1 and before harvesting, cells were exposed to a 30-60 min EdU pulse. Samples were harvested 24 h after 4-OHT and processed for EdU detection followed by IF-FISH for 53BP1 and telomeres. The percentage of EdU-positive cells in the whole cell population (all cells) and in TIF-positive cells is reported. Bars represent mean with SD from three independent experiments.

**(I)** Immunoblots for expression of FokI-TRF1 fusion proteins in cycling vs G0 (serum-starved) cells. Serum was withdrawn from fully confluent SV40LT-immortalized MEFs expressing FokI-ER<sup>T2</sup>-TRF1 proteins as follows: day 0: 10% FBS, day 1: 5% FBS, day 2: 2% FBS, day 3 and day 4: 1% FBS. On day 5 cells were given a 60 min EdU pulse before harvest. Asynchronous cells were kept in 10% FBS throughout the experiment.

Figure S2. Doksani and de Lange

A

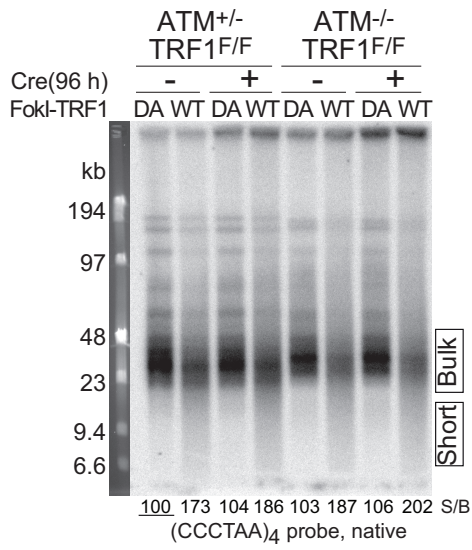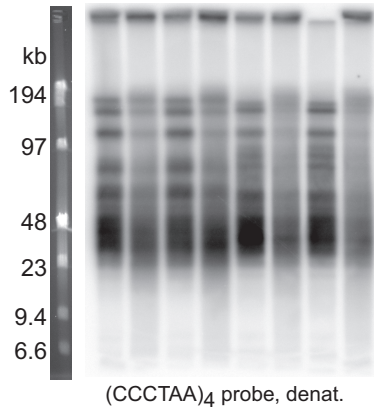

B

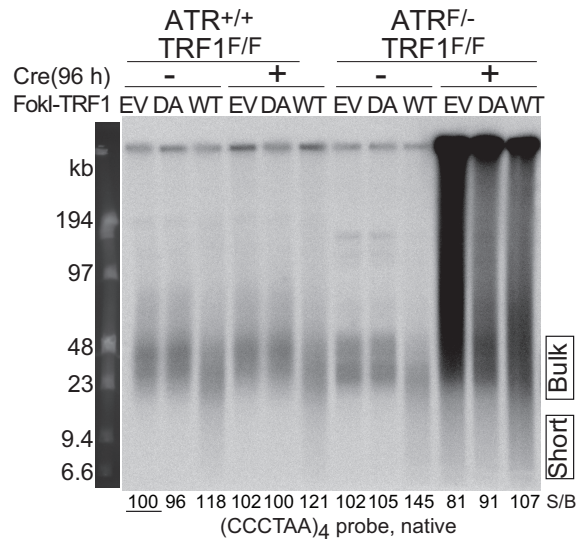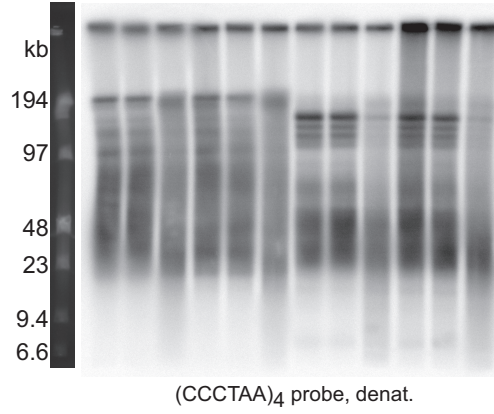

**Figure S2. FokI-mediated cutting of telomeric DNA in ATM- and ATR-deficient cells, related to Figure 2.**

**(A)** PFGE analysis of telomeric DNA. FokI-TRF1 fusions were introduced in the indicated cell lines by retroviral infection. After selection, cells were infected with H&R Cre retrovirus to induce deletion of the endogenous TRF1 and samples were analyzed 96 h later. The PFGE procedure is described in Fig. 1D. The values below the gel are reported relative to underlined sample, which is set to 100. Top: native hybridization. Bottom: denatured.

**(B)** PFGE analysis of telomeric DNA as in (A) but with cells lacking ATR after Cre treatment.

Figure S3. Doksani and de Lange

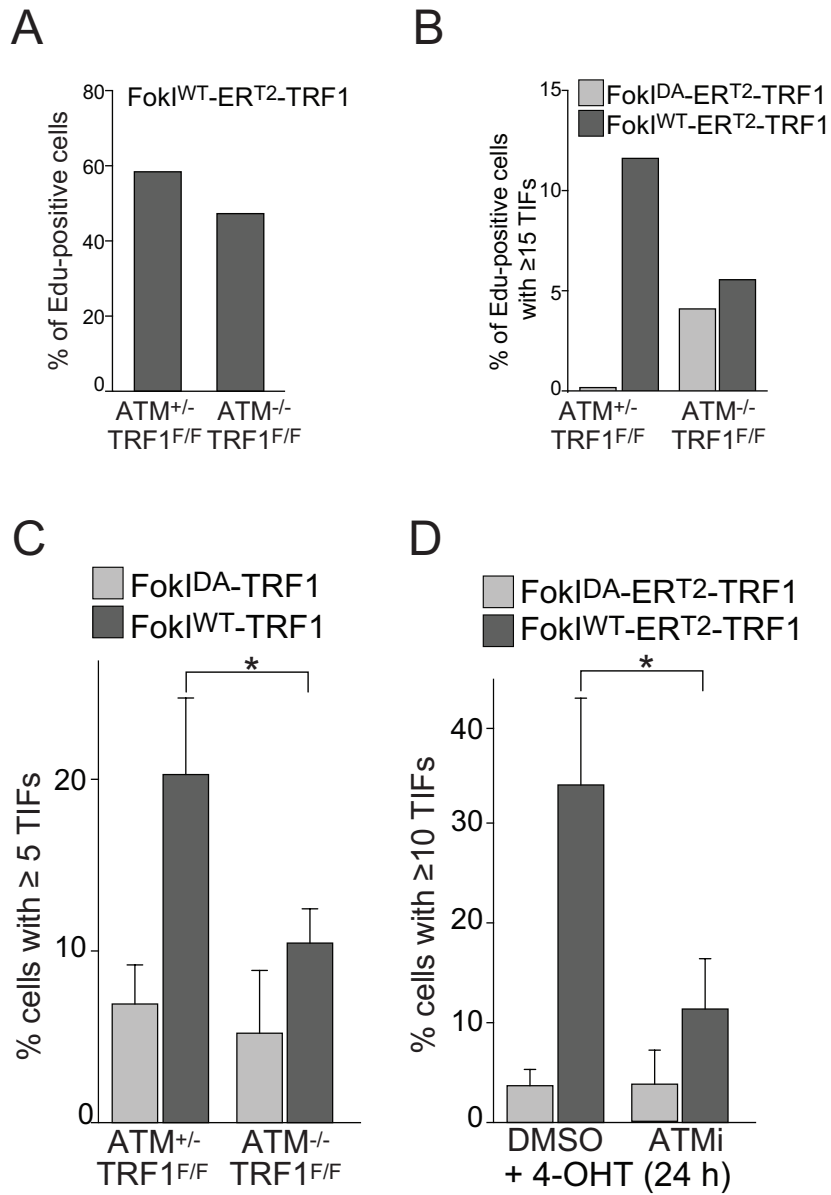

**Figure S3. Control experiments for the ATM-dependent signaling at FokI-induced DSBs, related to Figure 2.**

**(A)** Quantification of the EdU-positive fraction of the indicated cell lines. FokI<sup>WT</sup>-ER<sup>T2</sup>-TRF1 constructs were introduced in the indicated cell lines by retroviral infection. After selection, cells were incubated with EdU for 1 h before harvesting.

**(B)** Quantification of the TIF-response including only the EdU positive cells in the analysis. The conditional FokI-ER<sup>T2</sup>-TRF1 constructs were introduced by retroviral infection in the indicated cell lines. After selection, 4-OHT was added to induce FokI-ER<sup>T2</sup>-TRF1 and cells were exposed to an EdU pulse 1 h before harvesting (24 h after 4-OHT). Samples were processed for EdU detection followed by IF-FISH for 53BP1 and telomeres. The graph shows the quantification of the TIF response occurring only in EdU-positive cells. 53BP1-telomere co-localization counting was performed with the automated Fiji/ImageJ macro.

**(C)** Quantification of the TIF-positive cells in the presence of the endogenous TRF1. Same experimental procedure as the one in Fig. 2A, without the Cre-mediated deletion of TRF1. Bars represent mean with SD from 3 independent experiments (~100 cells each). P value from two tailed, paired t test.

**(D)** Effect of ATM inhibition on TIF response. The conditional FokI-ER<sup>T2</sup>-TRF1 construct was introduced into SV40LT-immortalized MEFs by retroviral infection. After selection, the ATM inhibitor KU55933 (5  $\mu$ M) was added for 24 h, followed by 4-OHT and fresh KU55933 for another 24 h. Bars represent means with SD from three experiments. P value from unpaired two-tailed t test.

Figure S4. Doksani and de Lange

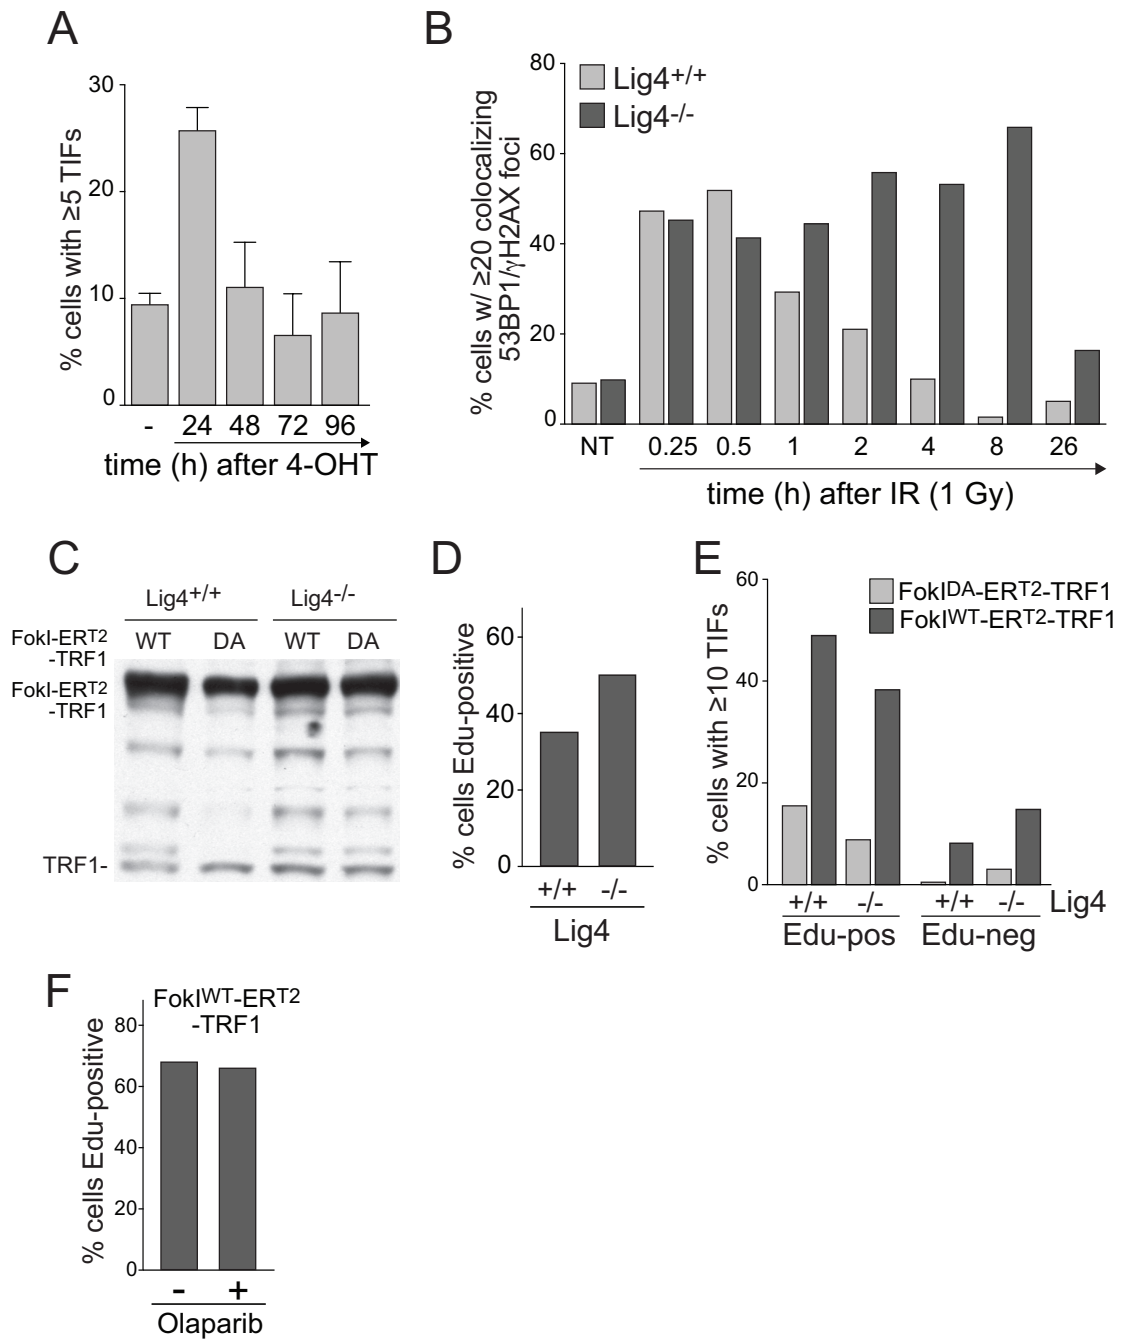

**Figure S4. Control experiments for DSB repair at telomere-internal DSBs, related to Figure 4.**

**(A)** Time course of TIFs disappearance after transient FokI<sup>WT</sup>-ER<sup>T2</sup>-TRF1 induction. SV40LT-immortalized MEFs were infected with the conditional FokI-ER<sup>T2</sup>-TRF1 construct. After selection, 4-OHT was added for 2 h and cells washed with PBS and fresh media without 4-OHT was added. TIFs were quantified in samples were collected at the indicated time points. Bars represent mean with SD from three independent experiments.

**(B)** Kinetics of clearance of IR-induced foci in Lig4-proficient and -deficient cells. SV40LT-immortalized TRF2<sup>F/F</sup>Lig4<sup>+/+</sup> and TRF2<sup>F/F</sup>Lig4<sup>-/-</sup> MEFs were exposed to 1 Gy IR, fixed at the indicated time points, processed for IF for 53BP1 and gH2AX. 53BP1 and gH2AX foci were scored using the automated Fiji/ImageJ macro.

**(C)** Western blot for FokI-ER<sup>T2</sup>-TRF1 expression for the experiment in Fig. 4A.

**(D)** Quantification of EdU-positive cells in Lig4<sup>+/+</sup> and Lig4<sup>-/-</sup> MEFs. Cells were incubated with EdU for 1 h before harvesting.

**(E)** Quantification of the TIF-response in EdU-positive or EdU-negative cells. The conditional FokI-ER<sup>T2</sup>-TRF1 constructs were introduced by retroviral infection in the indicated cell lines. After selection, 4-OHT was added for 24 h with an EdU pulse during the last h. Samples processed for EdU detection followed by IF-FISH for 53BP1 and telomeres. The graph shows the quantification of the TIF response occurring in EdU-positive and -negative cells. 53BP1-telomere co-localizations were scored using the automated Fiji/ImageJ macro.

**(F)** Quantification of the effect of Olaparib treatment (5 mM, 24 h) on the frequency of EdU-positive cells. FokI<sup>WT</sup>-ER<sup>T2</sup>-TRF1 was introduced in SV40LT-immortalized MEFs. After selection, 4-OHT was added for 24 h with an EdU pulse during the last h and processed for EdU detection
